# Supplementary material
Source: Springer Nature journal article supplement (https://www.springermedizin.de/resource/supplementary/12990_2011_394_MOESM2_ESM.pdf/9613180)

## A Spinal reflexes

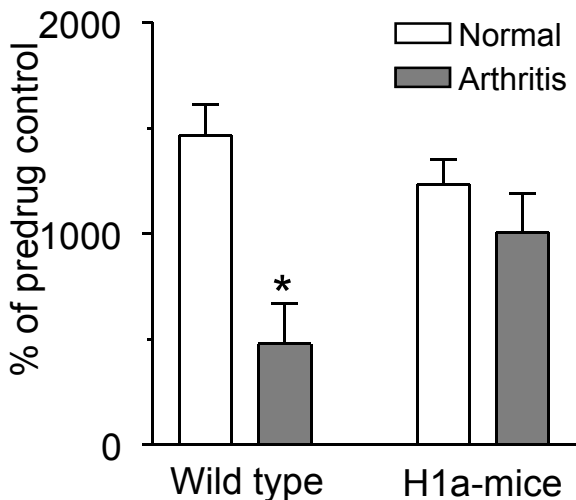

## B Audible vocalizations

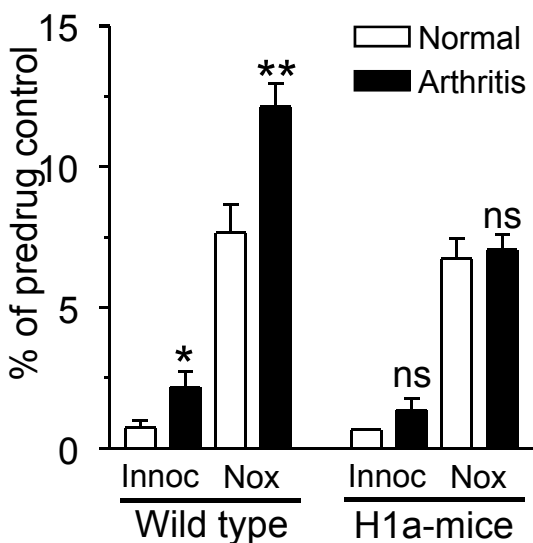

## C Ultrasonic vocalizations

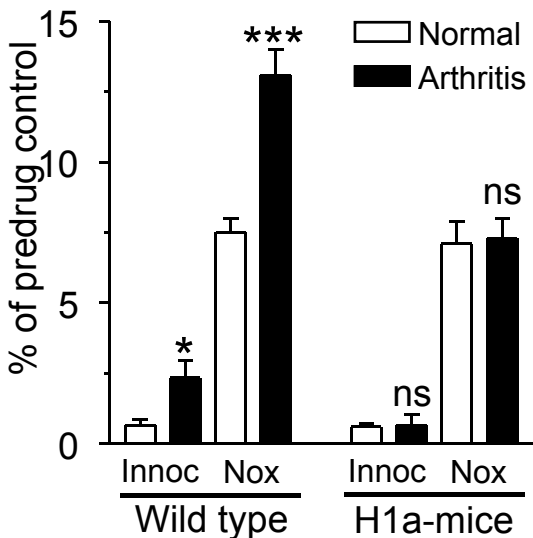

Supplement: MOESM2 [file 9613180]
